# Supplementary material for: The Intensive Care Lifeboat: a survey of lay attitudes to rationing dilemmas in neonatal intensive care
Source: PubMed Central journal article supplement (PMC5100211; doi:10.1186/s12910-016-0152-y), 2016-11-08

**Interaction between effects of utilitarian propensity and cost of treatment on willingness to admit patient**

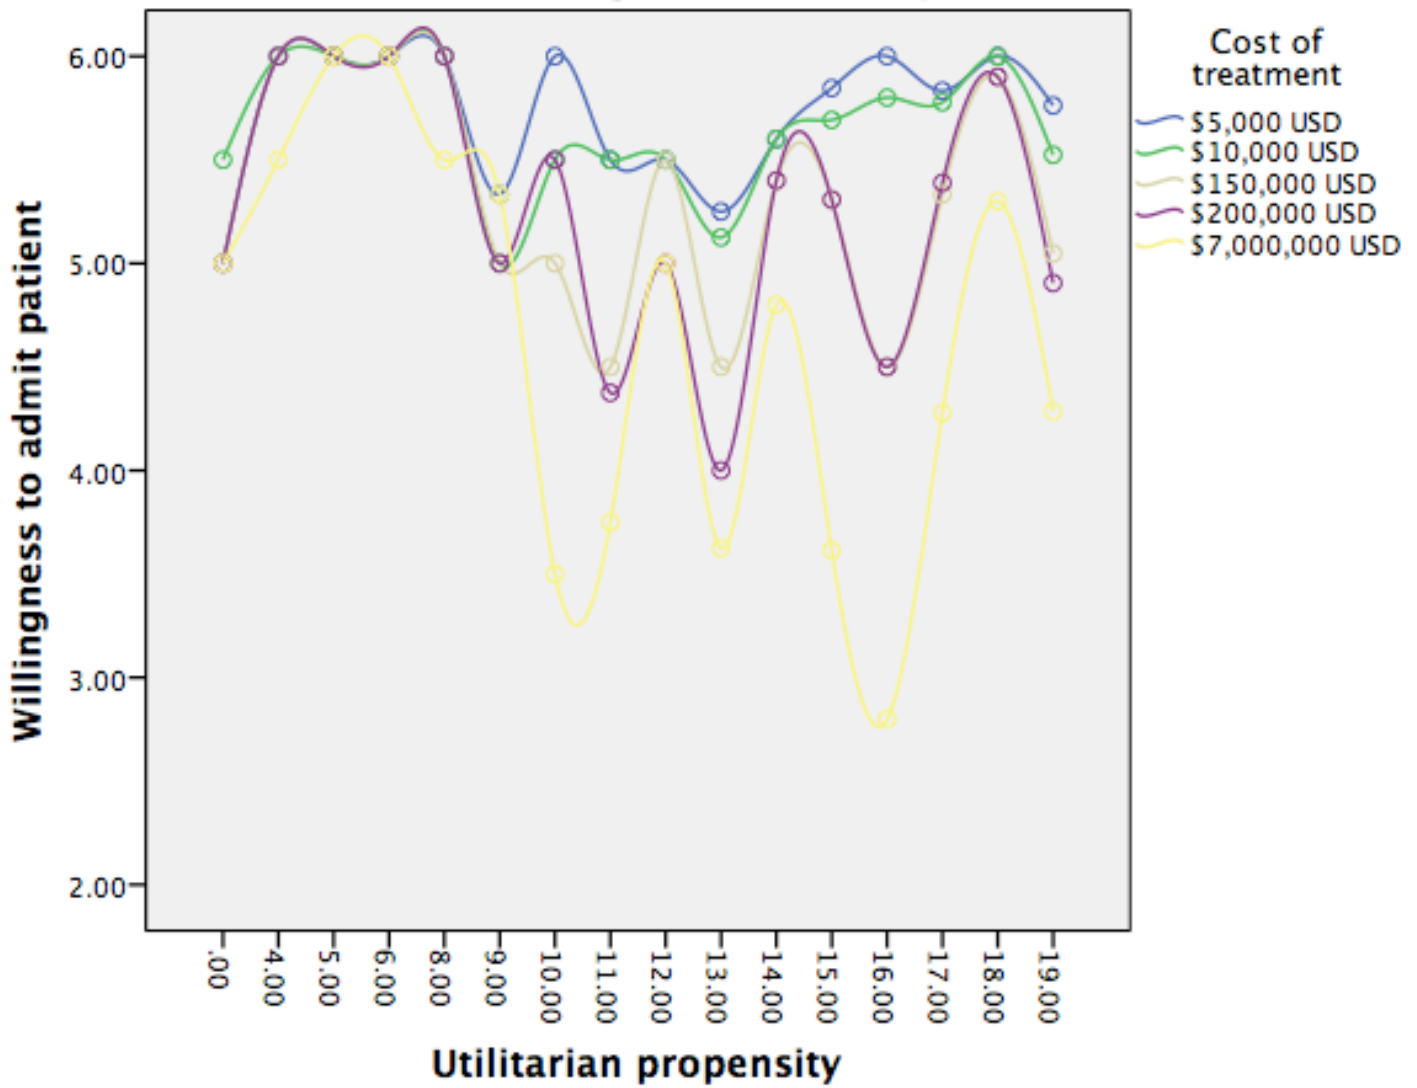

Supplement: 12910_2016_152_MOESM2_ESM.pdf [file 12910_2016_152_MOESM2_ESM.pdf]
