# Supplementary material for: The Intensive Care Lifeboat: a survey of lay attitudes to rationing dilemmas in neonatal intensive care
Source: PubMed Central journal article supplement (PMC5100211; doi:10.1186/s12910-016-0152-y), 2016-11-08
Supplement: 12910_2016_152_MOESM4_ESM.pdf [file 12910_2016_152_MOESM4_ESM.pdf]

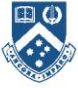

Monash University Human Research Ethics Committee (MUHREC)  
Research Office

## Human Ethics Certificate of Approval

This is to certify that the project below was considered by the Chair of the Monash University Human Research Ethics Committee. The Chair was satisfied that the proposal meets the requirements of the *National Statement on Ethical Conduct in Human Research* and has granted approval.

**Project Number:** CF14/1798 - 2014000906

**Project Title:** Ethics of Resource Allocation in the Neonatal Intensive Care Unit

**Chief Investigator:** Julian Saculescu

**Approved:** **From:** 30 June 2014

**To:** 30 June 2019

---

**Terms of approval - Failure to comply with the terms below is in breach of your approval and the Australian Code for the Responsible Conduct of Research.**

1. Approval is only valid whilst you hold a position at Monash University and approval at the primary HREC is current.
2. **Future correspondence:** Please quote the project number and project title above in any further correspondence.
3. **Final report:** A Final Report should be provided at the conclusion of the project. MUHREC should be notified if the project is discontinued before the expected date of completion.
4. **Retention and storage of data:** The Chief Investigator is responsible for the storage and retention of original data pertaining to a project for a minimum period of five years.

Professor Nip Thomson  
Chair, MUHREC

cc: Miss Chavy Arora
